# Supplementary material
Source: PubMed Central journal article supplement (PMC5601358)
Supplement: jm7b00950_si_001.pdf [file jm7b00950_si_001.pdf]

# Structure-Affinity Relationships and Structure-Kinetics Relationships of Pyrido[2,1-*f*]purine-2,4-dione Derivatives as Human Adenosine A<sub>3</sub> Receptor Antagonists

*Lizi Xia, Wessel A. C. Burger, Jacobus P.D. van Veldhoven, Boaz J. Kuiper, Tirsa T. van Duijl, Elke B. Lenselink, Ellen Paasman, Laura H. Heitman, and Adriaan P. IJzerman\**

Division of Medicinal Chemistry, Leiden Academic Centre for Drug Research, Leiden University, 2300 RA Leiden, The Netherlands

## Supporting information

### Contents

1. Binding affinities of short RT antagonist (**5**) and long RT antagonist (**27**) at human adenosine A<sub>1</sub> and A<sub>2A</sub> receptors S2,S3
2. The KRI values of pyrido[2,1-*f*]purine-2,4-dione derivatives without methoxy-substitution at C-8 position S2,S4
3. The comparison between the KRI values of pyrido[2,1-*f*]purine-2,4-dione derivatives without methoxy-substitution at C-8 position and their methoxy-substituted counterparts S2,S5
4. The correlation between  $pk_{off}$  and LogP for antagonists S2,S6

1. Binding affinities of short RT antagonist (**5**) and long RT antagonist (**27**) at human adenosine A<sub>1</sub> and A<sub>2A</sub> receptors

Binding affinities of antagonist **5** at hA<sub>1</sub> and hA<sub>2A</sub> receptors have been reported before,<sup>1</sup> whilst binding affinities of antagonist **27** at hA<sub>1</sub> and hA<sub>2A</sub> receptors were determined as described previously.<sup>2,3</sup> Percentage displacement of antagonists (n=2, average) or K<sub>i</sub> ± SEM (nM, n=3) at human adenosine A<sub>1</sub> and A<sub>2A</sub> receptors are listed in Table S1.

2. The KRI values of pyrido[2,1-f]purine-2,4-dione derivatives without methoxy-substitution at C-8 position

The KRI values of pyrido[2,1-f]purine-2,4-dione derivatives without methoxy-substitution at C-8 position were obtained as described under “*the ‘dual-point’ competition association assays*”. Experiments were designed as described previously,<sup>4</sup> where in this case the two time points were selected at 20 (t<sub>1</sub>) and 240 min (t<sub>2</sub>). The results are listed in Table S2.

3. The comparison between the KRI values of pyrido[2,1-f]purine-2,4-dione derivatives without methoxy-substitution at C-8 position and their methoxy-substituted counterparts  
The comparison is presented in Figure S1.

4. The correlation between pk<sub>off</sub> and LogP for antagonists

LogP values were calculated using Chemdraw Professional 15.0 (Cambridge Soft, Perkin Elmer, Waltham, MA, USA). R<sup>2</sup> and P values were calculated using the GraphPad Prism linear regression analysis function. The correlations are presented in Figure S2.

Table S1. Binding affinities of short RT antagonist (**5**) and long RT antagonist (**27**) at human adenosine A<sub>1</sub> and A<sub>2A</sub> receptors.

| Compound  | hA <sub>1</sub> <sup>a</sup> | hA <sub>2A</sub> <sup>b</sup> |
|-----------|------------------------------|-------------------------------|
| <b>5</b>  | 49% <sup>c</sup>             | 10% <sup>c</sup>              |
| <b>27</b> | 209 ± 16                     | 24%                           |

<sup>a</sup> Displacement of [<sup>3</sup>H]DPCPX from CHO cell membranes expressing the human adenosine A<sub>1</sub> receptor. Percentage displacement at 10 μM (n=2, average) or K<sub>i</sub> ± SEM (nM, n=3).

<sup>b</sup> Displacement of [<sup>3</sup>H]ZM241385 from CHO cell membranes expressing the human adenosine A<sub>2A</sub> receptor. Percentage displacement at 10 (**5**) or 1 μM (**27**, n=2, average),

<sup>c</sup> Published data.<sup>1</sup>

Table S2. Kinetic Parameters of Pyrido[2,1-*f*]purine-2,4-dione Derivatives without Methoxy-substitution at C-8 Position.

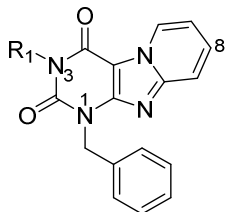

| Compound | R <sub>1</sub>                                    | KRI <sup>a</sup>    |
|----------|---------------------------------------------------|---------------------|
| S1       | CH <sub>2</sub> CH <sub>3</sub>                   | 0.61<br>(0.63,0.59) |
| S2       | CH <sub>2</sub> CH <sub>2</sub> CH <sub>3</sub>   | 0.59<br>(0.40,0.77) |
| S3       | CH <sub>2</sub> CH(CH <sub>3</sub> ) <sub>2</sub> | 0.88<br>(0.85,0.90) |
| S4       | CH <sub>2</sub> CH=CH <sub>2</sub>                | 0.88<br>(0.79,0.96) |
| S5       | CH <sub>2</sub> C≡CH                              | 1.16 ± 0.38         |
| S6       | CH <sub>2</sub> C <sub>3</sub> H <sub>5</sub>     | 1.01<br>(1.08,0.93) |

<sup>a</sup> KRI ± SEM (n = 3) or KRI (n = 2, individual estimates in parentheses), obtained at 10 °C from dual point competition association assays at 10 °C with [<sup>3</sup>H]**34** on CHO cell membranes stably expressing the hA<sub>3</sub>R.

## Supplementary

### Figures

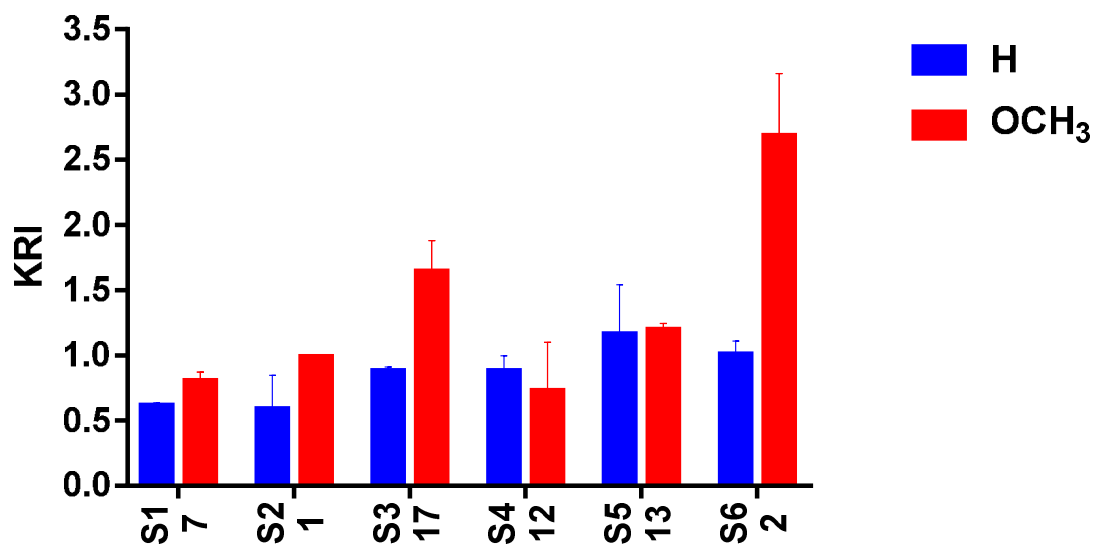

**Figure S1:** Comparison of KRI values of compounds with (red bars) and without (blue bars) C-8 methoxy substitution. KRI values obtained from dual point competition association assay on CHO cells stably expressing hA<sub>3</sub>R at 10 °C. Each data point is the average of two or three independent experiments performed in duplicate.

**A.**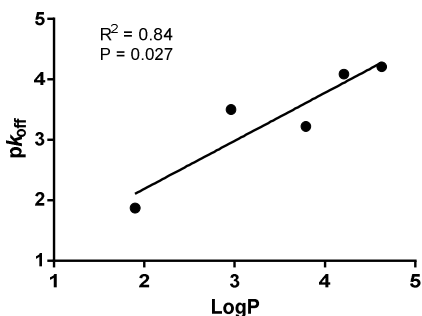**B.**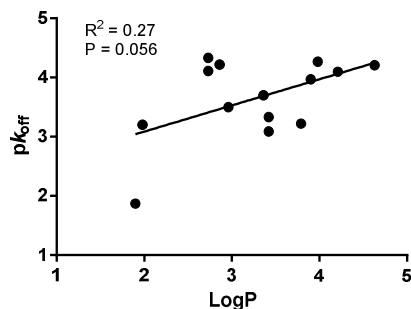

**Figure S2:** Correlation between  $pK_{off}$  and  $\text{LogP}$  for antagonists with an elongated carbon chain (1, 5, 9, 10 and 11) at the  $R_1$  position (A), or for all antagonists (B), obtained from competition association assays.

## References

1. Priego, E.-M.; von Frijtag Drabbe Kuenzel, J.; IJzerman, A. P.; Camarasa, M.-J.; Pérez-Pérez, M.-J. Pyrido[2,1-f]purine-2,4-dione derivatives as a novel class of highly potent human A3 adenosine receptor antagonists. *J. Med. Chem.* **2002**, *45*, 3337-3344.
2. Guo, D.; Xia, L.; van Veldhoven, J. P. D.; Hazeu, M.; Mocking, T.; Brussee, J.; IJzerman, A. P.; Heitman, L. H. Binding Kinetics of ZM241385 Derivatives at the human adenosine  $A_{2A}$  receptor. *ChemMedChem* **2014**, *9*, 752-761.
3. Xia, L.; de Vries, H.; IJzerman, A. P.; Heitman, L. H. Scintillation proximity assay (SPA) as a new approach to determine a ligand's kinetic profile. A case in point for the adenosine  $A_1$  receptor. *Purinergic Signalling* **2016**, *12*, 115-126.
4. Guo, D.; van Dorp, E. J. H.; Mulder-Krieger, T.; van Veldhoven, J. P. D.; Brussee, J.; IJzerman, A. P.; Heitman, L. H. Dual-point competition association assay: a fast and high-throughput kinetic screening method for assessing ligand-receptor binding kinetics. *J. Biomol. Screening* **2013**, *18*, 309-320.
